# Supplementary material for: Synthesis and crystal structure of a luminescent infinite 2D brick-wall network with two- and three-coordinate silver(I) atoms and ligand-unsupported silver–silver interactions
Source: Royal Society of Chemistry journal article supplement (doi:10.1039/b008266j), 2001-01-01
Supplement: b008266j.doc [file b008266j.doc]

**Fig. 1S** Top view of the 2D network of [Ag3(py-hep)2](ClO4)3•(CH3CN)0.5 with the hydrogen bonds and weak Ag•••O interactions indicated by dashed lines.
